# Supplementary material for: Validation of the Korean Frailty Index in community-dwelling older adults in a nationwide Korean Frailty and Aging Cohort study
Source: PubMed Central journal article supplement — Korean J Intern Med. 2020 Apr 17;36(2):456–66. doi: 10.3904/kjim.2019.172 (PMC7969080; doi:10.3904/kjim.2019.172), 2020-04-17
Supplement: kjim-2019-172-suppl.pdf [file kjim-2019-172-suppl.pdf]

**Supplementary Table 1. Mean score of KFI, mKFI, and CHS frailty scale in urban and rural dwelling older people in the study**

| Score             | Men             |                 |                | Women           |                 |                |
|-------------------|-----------------|-----------------|----------------|-----------------|-----------------|----------------|
|                   | Urban (n = 683) | Rural (n = 691) | <i>p</i> value | Urban (n = 813) | Rural (n = 699) | <i>p</i> value |
| KFI               | 1.8 ± 1.5       | 2.0 ± 1.6       | 0.046          | 2.2 ± 1.5       | 2.6 ± 1.7       | 0.005          |
| mKFI              | 1.6 ± 1.4       | 1.7 ± 1.5       | 0.024          | 2.1 ± 1.6       | 2.4 ± 1.7       | 0.001          |
| CHS frailty scale | 0.6 ± 0.9       | 0.8 ± 1.0       | < 0.001        | 0.9 ± 0.9       | 1.3 ± 1.1       | < 0.001        |

Values are presented as mean ± SD.

KFI, Korean Frailty Index; mKFI, modified Korean Frailty Index; CHS, Cardiovascular Health Study.
